# Supplementary material for: Spawning Phenology and Early Growth of Japanese Anchovy (Engraulis japonicus) off the Pacific Coast of Japan
Source: MDPI journal article supplement (doi:10.3390/fishes8010011), 2022-12-25
Supplement: s1 [file s1]

## Supplementary materials

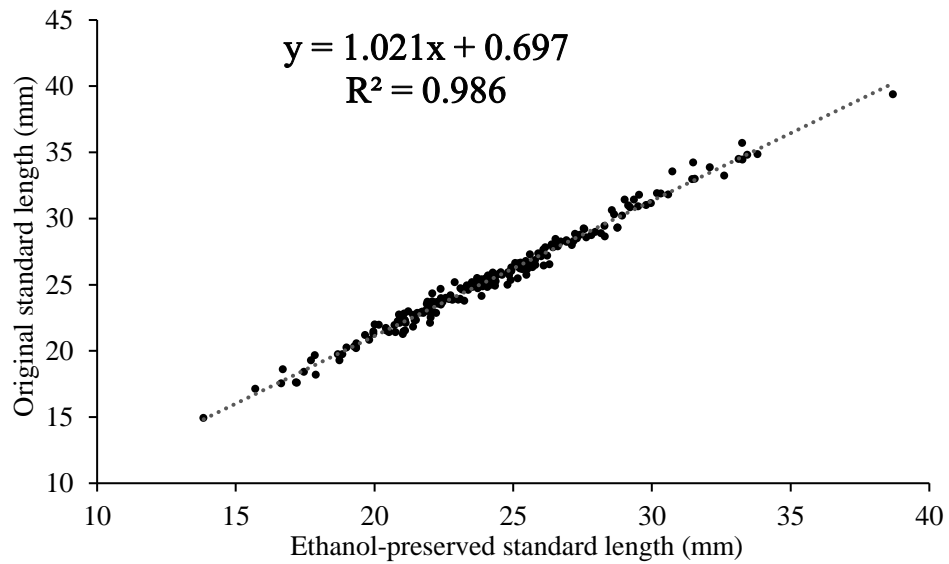

**Figure S1.** Relationship between original standard length and ethanol-preserved standard length.

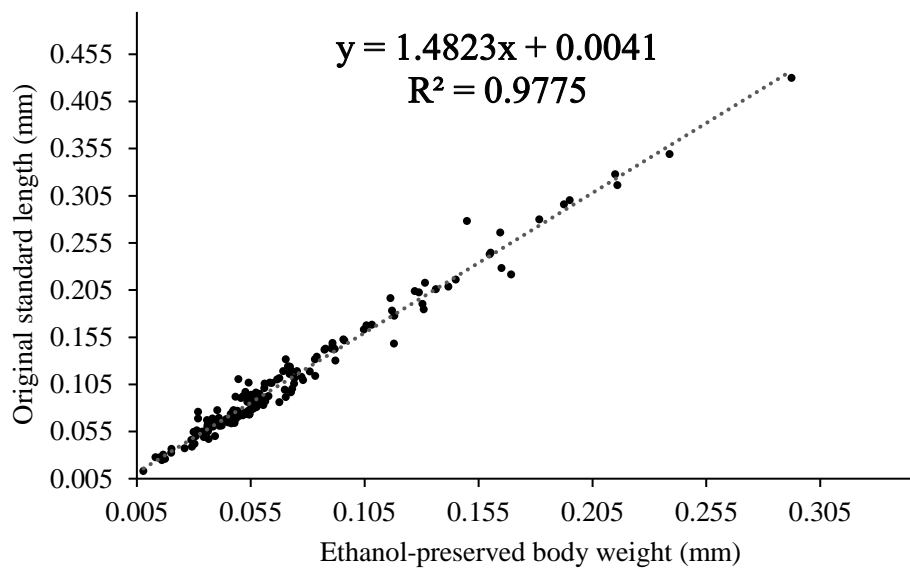

**Figure S2.** Relationship between original body weight and ethanol-preserved body weight.

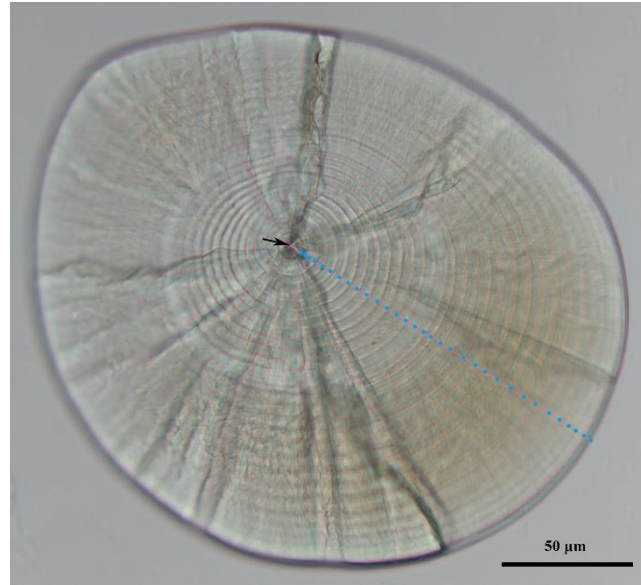

**Figure S3.** Microphotograph of otolith of a Japanese anchovy from 25 March 2020, Tosa Bay (TOB) (standard length (SL) = 21.28 mm; Age = 35). The black arrow indicates the primordium, the red line represents the count axis, and the blue dot indicates the daily incremental count point.

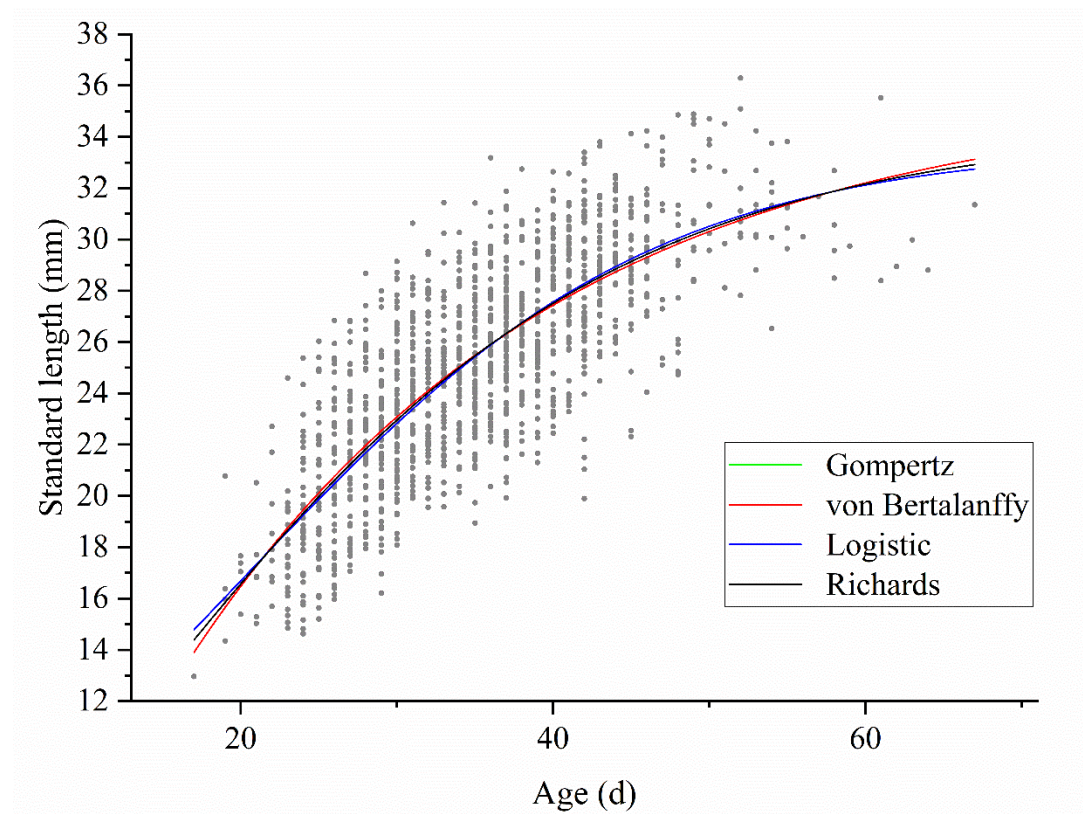

**Figure S4.** Growth curves of the four growth models for larval and juvenile Japanese anchovy off the Pacific coast of Japan in 2020–2021.

**Table S1.** Multiple comparisons of Area-effect on mean daily growth rate in HD-based model.

|               | <b>Estimate</b> | <b>Std. Error</b> | <b>z value</b> | <b>Pr(&gt; z )</b> |
|---------------|-----------------|-------------------|----------------|--------------------|
| CWI – SEB = 0 | 0.087           | 0.017             | 5.084          | <0.001***          |
| SAB – SEB = 0 | 0.063           | 0.020             | 3.159          | 0.016*             |
| SUB – SEB = 0 | 0.073           | 0.022             | 3.332          | 0.009**            |
| TOB – SEB = 0 | –0.017          | 0.021             | –0.841         | 1.000              |
| SAB – CWI = 0 | –0.024          | 0.014             | –1.732         | 0.832              |
| SUB – CWI = 0 | –0.014          | 0.014             | –0.982         | 1.000              |
| TOB – CWI = 0 | –0.104          | 0.013             | –8.198         | <0.001***          |
| SUB – SAB = 0 | 0.010           | 0.014             | 0.753          | 1.000              |
| TOB – SAB = 0 | –0.080          | 0.013             | –6.381         | <0.001***          |
| TOB – SUB = 0 | –0.090          | 0.008             | –10.749        | <0.001***          |
